# Supplementary material
Source: publisher figshare collection journal article supplement (https://acs.figshare.com/ndownloader/files/4088107)
Supplement: Supplementary file 1 [file 4088107]

 
data_cba180 
 
_audit_creation_method            SHELXL-97 
_chemical_name_systematic 
; 
 ? 
; 
_chemical_name_common             ? 
_chemical_melting_point           ? 
_chemical_formula_moiety          'C19 H16 Cl N8 O5 Re, C3 H6 O' 
_chemical_formula_sum 
 'C22 H22 Cl N8 O6 Re' 
_chemical_formula_weight          716.13 
 
loop_ 
 _atom_type_symbol 
 _atom_type_description 
 _atom_type_scat_dispersion_real 
 _atom_type_scat_dispersion_imag 
 _atom_type_scat_source 
 'C'  'C'   0.0033   0.0016 
 'International Tables Vol C Tables 4.2.6.8 and 6.1.1.4' 
 'H'  'H'   0.0000   0.0000 
 'International Tables Vol C Tables 4.2.6.8 and 6.1.1.4' 
 'N'  'N'   0.0061   0.0033 
 'International Tables Vol C Tables 4.2.6.8 and 6.1.1.4' 
 'O'  'O'   0.0106   0.0060 
 'International Tables Vol C Tables 4.2.6.8 and 6.1.1.4' 
 'Cl'  'Cl'   0.1484   0.1585 
 'International Tables Vol C Tables 4.2.6.8 and 6.1.1.4' 
 'Re'  'Re'  -1.0185   7.2310 
 'International Tables Vol C Tables 4.2.6.8 and 6.1.1.4' 
 
_symmetry_cell_setting           'Triclinic'
_symmetry_space_group_name_H-M    'P-1'
_symmetry_space_group_name_Hall '-P 1'   
 
loop_ 
 _symmetry_equiv_pos_as_xyz 
 'x, y, z' 
 '-x, -y, -z' 
 
_cell_length_a                    8.0288(6) 
_cell_length_b                    12.0059(9) 
_cell_length_c                    13.8546(11) 
_cell_angle_alpha                 87.051(3) 
_cell_angle_beta                  81.659(3) 
_cell_angle_gamma                 76.564(3) 
_cell_volume                      1284.98(17) 
_cell_formula_units_Z             2 
_cell_measurement_temperature     89(2) 
_cell_measurement_reflns_used     9938
_cell_measurement_theta_min       2.27
_cell_measurement_theta_max       30.48 
 
_exptl_crystal_description        block 
_exptl_crystal_colour             colourless 
_exptl_crystal_size_max           0.51 
_exptl_crystal_size_mid           0.29
_exptl_crystal_size_min           0.17 
_exptl_crystal_density_meas       ? 
_exptl_crystal_density_diffrn     1.851 
_exptl_crystal_density_method     'not measured' 
_exptl_crystal_F_000              700 
_exptl_absorpt_coefficient_mu     4.887 
_exptl_absorpt_correction_type    'multi-scan'
_exptl_absorpt_correction_T_min   0.5344 
_exptl_absorpt_correction_T_max   0.7454 
_exptl_absorpt_process_details    'SADABS (Bruker, 2004)'
 
_exptl_special_details 
; 
 ? 
; 
 
_diffrn_ambient_temperature       89(2) 
_diffrn_radiation_wavelength      0.71073 
_diffrn_radiation_type            MoK\a 
_diffrn_radiation_source          'fine-focus sealed tube' 
_diffrn_radiation_monochromator   graphite 
_diffrn_measurement_device_type   'Bruker APEXII CCD area detector' 
_diffrn_measurement_method        'phi and omega scans'
_diffrn_detector_area_resol_mean  ? 
_diffrn_standards_number          0 
_diffrn_standards_interval_count  ? 
_diffrn_standards_interval_time   ? 
_diffrn_standards_decay_%         ? 
_diffrn_reflns_number             36984 
_diffrn_reflns_av_R_equivalents   0.0347 
_diffrn_reflns_av_sigmaI/netI     0.0218 
_diffrn_reflns_limit_h_min        -10 
_diffrn_reflns_limit_h_max        10 
_diffrn_reflns_limit_k_min        -15 
_diffrn_reflns_limit_k_max        15 
_diffrn_reflns_limit_l_min        -17 
_diffrn_reflns_limit_l_max        17 
_diffrn_reflns_theta_min          2.63 
_diffrn_reflns_theta_max          26.45 
_reflns_number_total              5264 
_reflns_number_gt                 5094 
_reflns_threshold_expression      >2sigma(I) 
 
_computing_data_collection      'Bruker APEX2'
_computing_cell_refinement      'Bruker SAINT'
_computing_data_reduction       'Bruker SAINT'
_computing_structure_solution   'SHELXS-97 (Sheldrick, 2008)'
_computing_structure_refinement 'SHELXL-97 (Sheldrick, 2008)'
_computing_molecular_graphics   'Bruker SHELXTL'
_computing_publication_material 'Bruker SHELXTL'
 
_refine_special_details 
; 
 Refinement of F^2^ against ALL reflections.  The weighted R-factor wR and 
 goodness of fit S are based on F^2^, conventional R-factors R are based 
 on F, with F set to zero for negative F^2^. The threshold expression of 
 F^2^ > 2sigma(F^2^) is used only for calculating R-factors(gt) etc. and is 
 not relevant to the choice of reflections for refinement.  R-factors based 
 on F^2^ are statistically about twice as large as those based on F, and R- 
 factors based on ALL data will be even larger. 
; 
 
_refine_ls_structure_factor_coef  Fsqd  
_refine_ls_matrix_type            full 
_refine_ls_weighting_scheme       calc  
_refine_ls_weighting_details 
 'calc w=1/[\s^2^(Fo^2^)+(0.0181P)^2^+1.5781P] where P=(Fo^2^+2Fc^2^)/3' 
_atom_sites_solution_primary      direct 
_atom_sites_solution_secondary    difmap 
_atom_sites_solution_hydrogens    geom 
_refine_ls_hydrogen_treatment     constr
_refine_ls_extinction_method      none 
_refine_ls_extinction_coef        ? 
_refine_ls_number_reflns          5264 
_refine_ls_number_parameters      347 
_refine_ls_number_restraints      0 
_refine_ls_R_factor_all           0.0195 
_refine_ls_R_factor_gt            0.0184 
_refine_ls_wR_factor_ref          0.0478 
_refine_ls_wR_factor_gt           0.0470 
_refine_ls_goodness_of_fit_ref    1.171 
_refine_ls_restrained_S_all       1.171 
_refine_ls_shift/su_max           0.002 
_refine_ls_shift/su_mean          0.000 
 
loop_ 
 _atom_site_label 
 _atom_site_type_symbol 
 _atom_site_fract_x 
 _atom_site_fract_y 
 _atom_site_fract_z 
 _atom_site_U_iso_or_equiv 
 _atom_site_adp_type 
 _atom_site_occupancy 
 _atom_site_symmetry_multiplicity 
 _atom_site_calc_flag 
 _atom_site_refinement_flags 
 _atom_site_disorder_assembly 
 _atom_site_disorder_group 
Re1 Re 1.069121(13) 0.260749(9) 0.493638(7) 0.01566(4) Uani 1 1 d . . . 
C1 C 1.2515(4) 0.0171(2) 0.5539(2) 0.0211(6) Uani 1 1 d . . . 
H1 H 1.1741 0.0004 0.5139 0.025 Uiso 1 1 calc R . . 
C2 C 1.3566(4) -0.0727(3) 0.5977(2) 0.0237(6) Uani 1 1 d . . . 
H2 H 1.3513 -0.1494 0.5876 0.028 Uiso 1 1 calc R . . 
C3 C 1.4694(4) -0.0501(3) 0.6563(2) 0.0242(6) Uani 1 1 d . . . 
H3 H 1.5426 -0.1106 0.6875 0.029 Uiso 1 1 calc R . . 
C4 C 1.4734(4) 0.0630(3) 0.6686(2) 0.0214(6) Uani 1 1 d . . . 
H4 H 1.5502 0.0811 0.7082 0.026 Uiso 1 1 calc R . . 
C5 C 1.3647(4) 0.1494(2) 0.6225(2) 0.0180(6) Uani 1 1 d . . . 
C6 C 1.3680(3) 0.2728(2) 0.6360(2) 0.0181(6) Uani 1 1 d . . . 
H6A H 1.4515 0.2762 0.6812 0.022 Uiso 1 1 calc R . . 
H6B H 1.4072 0.3065 0.5725 0.022 Uiso 1 1 calc R . . 
C7 C 1.1455(4) 0.3971(2) 0.7588(2) 0.0172(6) Uani 1 1 d . . . 
H7 H 1.2132 0.4027 0.8085 0.021 Uiso 1 1 calc R . . 
C8 C 0.9745(4) 0.4461(2) 0.7569(2) 0.0163(6) Uani 1 1 d . . . 
C9 C 0.8435(4) 0.5172(2) 0.8307(2) 0.0187(6) Uani 1 1 d . . . 
H9A H 0.8984 0.5283 0.8879 0.022 Uiso 1 1 calc R . . 
H9B H 0.7974 0.5934 0.8020 0.022 Uiso 1 1 calc R . . 
C10 C 0.5895(4) 0.4390(3) 0.8046(2) 0.0231(6) Uani 1 1 d . . . 
H10 H 0.5848 0.4684 0.7398 0.028 Uiso 1 1 calc R . . 
C11 C 0.5374(4) 0.3519(2) 0.9375(2) 0.0188(6) Uani 1 1 d . . . 
C12 C 0.3160(4) 0.2435(3) 0.9977(2) 0.0313(7) Uani 1 1 d . . . 
H12A H 0.2806 0.2024 1.0572 0.038 Uiso 1 1 calc R . . 
H12B H 0.3484 0.1907 0.9429 0.038 Uiso 1 1 calc R . . 
H12C H 0.2197 0.3064 0.9838 0.038 Uiso 1 1 calc R . . 
C13 C 0.5308(4) 0.2725(3) 1.0981(2) 0.0243(6) Uani 1 1 d . . . 
C14 C 0.7429(5) 0.2980(3) 1.1987(2) 0.0339(8) Uani 1 1 d . . . 
H14A H 0.8140 0.2196 1.1979 0.041 Uiso 1 1 calc R . . 
H14B H 0.6496 0.3057 1.2538 0.041 Uiso 1 1 calc R . . 
H14C H 0.8148 0.3520 1.2057 0.041 Uiso 1 1 calc R . . 
C15 C 0.7476(4) 0.3889(3) 1.0367(2) 0.0204(6) Uani 1 1 d . . . 
C16 C 0.6709(4) 0.4000(2) 0.9489(2) 0.0169(6) Uani 1 1 d . . . 
N1 N 1.2537(3) 0.1275(2) 0.56521(17) 0.0162(5) Uani 1 1 d . . . 
N2 N 1.1969(3) 0.33932(19) 0.67524(17) 0.0164(5) Uani 1 1 d . . . 
N3 N 1.0633(3) 0.35172(19) 0.62460(17) 0.0161(5) Uani 1 1 d . . . 
N4 N 0.9267(3) 0.4171(2) 0.67319(17) 0.0174(5) Uani 1 1 d . . . 
N5 N 0.7016(3) 0.4588(2) 0.86152(17) 0.0176(5) Uani 1 1 d . . . 
N6 N 0.4863(3) 0.3743(2) 0.84811(18) 0.0230(5) Uani 1 1 d . . . 
N7 N 0.4640(3) 0.2900(2) 1.01110(18) 0.0214(5) Uani 1 1 d . . . 
N8 N 0.6686(3) 0.3227(2) 1.10719(17) 0.0218(5) Uani 1 1 d . . . 
O1 O 0.4721(3) 0.2167(2) 1.16472(17) 0.0360(6) Uani 1 1 d . . . 
O2 O 0.8657(3) 0.4307(2) 1.05245(15) 0.0283(5) Uani 1 1 d . . . 
C21 C 1.2477(4) 0.3253(2) 0.4200(2) 0.0221(6) Uani 1 1 d . . . 
O21 O 1.3518(3) 0.3591(2) 0.37612(17) 0.0296(5) Uani 1 1 d . . . 
C22 C 1.0734(4) 0.1729(3) 0.3809(2) 0.0211(6) Uani 1 1 d . . . 
O22 O 1.0762(3) 0.1227(2) 0.31210(16) 0.0317(5) Uani 1 1 d . . . 
C23 C 0.8874(4) 0.3763(3) 0.4478(2) 0.0196(6) Uani 1 1 d . . . 
O23 O 0.7731(3) 0.44270(19) 0.42322(17) 0.0281(5) Uani 1 1 d . . . 
Cl1 Cl 0.84539(10) 0.17746(6) 0.59463(5) 0.02463(16) Uani 1 1 d . . . 
O31 O 0.9406(5) 0.1423(3) 0.9877(2) 0.0618(9) Uani 1 1 d . . . 
C31 C 1.0685(7) 0.0865(5) 0.8285(3) 0.0705(16) Uani 1 1 d . . . 
H31A H 1.1541 0.1285 0.8408 0.085 Uiso 1 1 calc R . . 
H31B H 1.0205 0.1167 0.7688 0.085 Uiso 1 1 calc R . . 
H31C H 1.1241 0.0051 0.8206 0.085 Uiso 1 1 calc R . . 
C32 C 0.9285(6) 0.1002(3) 0.9114(3) 0.0438(9) Uani 1 1 d . . . 
C33 C 0.7742(6) 0.0581(4) 0.8966(4) 0.0582(12) Uani 1 1 d . . . 
H33A H 0.6996 0.0569 0.9591 0.070 Uiso 1 1 calc R . . 
H33B H 0.8111 -0.0195 0.8707 0.070 Uiso 1 1 calc R . . 
H33C H 0.7101 0.1091 0.8503 0.070 Uiso 1 1 calc R . . 
 
loop_ 
 _atom_site_aniso_label 
 _atom_site_aniso_U_11 
 _atom_site_aniso_U_22 
 _atom_site_aniso_U_33 
 _atom_site_aniso_U_23 
 _atom_site_aniso_U_13 
 _atom_site_aniso_U_12 
Re1 0.01679(7) 0.01642(7) 0.01486(6) -0.00132(4) -0.00425(4) -0.00450(4) 
C1 0.0221(15) 0.0212(15) 0.0198(14) -0.0031(12) 0.0004(12) -0.0057(12) 
C2 0.0269(16) 0.0179(14) 0.0236(15) 0.0016(12) 0.0026(13) -0.0040(12) 
C3 0.0222(15) 0.0226(15) 0.0228(15) 0.0058(12) 0.0008(12) 0.0013(12) 
C4 0.0177(14) 0.0268(15) 0.0181(14) 0.0017(12) -0.0020(11) -0.0026(12) 
C5 0.0150(13) 0.0222(14) 0.0153(13) -0.0033(11) 0.0008(11) -0.0026(11) 
C6 0.0128(13) 0.0208(14) 0.0207(14) -0.0035(12) -0.0034(11) -0.0024(11) 
C7 0.0201(14) 0.0175(13) 0.0166(13) -0.0004(11) -0.0060(11) -0.0075(11) 
C8 0.0170(14) 0.0176(13) 0.0163(13) -0.0011(11) -0.0032(11) -0.0075(11) 
C9 0.0191(14) 0.0206(14) 0.0182(14) -0.0017(12) -0.0028(11) -0.0080(12) 
C10 0.0196(15) 0.0326(17) 0.0199(15) 0.0021(13) -0.0085(12) -0.0085(13) 
C11 0.0180(14) 0.0178(14) 0.0199(14) -0.0038(11) -0.0021(11) -0.0021(11) 
C12 0.0324(18) 0.0400(19) 0.0290(17) 0.0009(15) -0.0055(14) -0.0230(16) 
C13 0.0244(16) 0.0263(16) 0.0234(15) -0.0025(13) -0.0029(13) -0.0082(13) 
C14 0.0363(19) 0.049(2) 0.0215(16) 0.0076(15) -0.0130(14) -0.0169(17) 
C15 0.0179(14) 0.0244(15) 0.0181(14) -0.0049(12) -0.0016(11) -0.0029(12) 
C16 0.0158(13) 0.0176(13) 0.0176(14) -0.0020(11) -0.0028(11) -0.0039(11) 
N1 0.0173(12) 0.0161(11) 0.0154(11) -0.0012(9) -0.0017(9) -0.0047(9) 
N2 0.0145(11) 0.0174(11) 0.0191(12) -0.0018(10) -0.0062(9) -0.0046(9) 
N3 0.0162(12) 0.0151(11) 0.0182(12) -0.0004(9) -0.0061(9) -0.0035(9) 
N4 0.0161(12) 0.0181(12) 0.0190(12) -0.0023(10) -0.0038(9) -0.0043(10) 
N5 0.0151(12) 0.0210(12) 0.0178(12) -0.0006(10) -0.0030(9) -0.0058(10) 
N6 0.0203(13) 0.0302(14) 0.0213(13) -0.0011(11) -0.0068(10) -0.0088(11) 
N7 0.0210(13) 0.0246(13) 0.0218(13) 0.0002(11) -0.0046(10) -0.0108(11) 
N8 0.0219(13) 0.0292(14) 0.0167(12) 0.0003(10) -0.0063(10) -0.0083(11) 
O1 0.0403(14) 0.0472(15) 0.0270(12) 0.0118(11) -0.0071(11) -0.0243(12) 
O2 0.0256(12) 0.0434(13) 0.0225(11) 0.0002(10) -0.0083(9) -0.0183(10) 
C21 0.0318(17) 0.0142(14) 0.0179(14) -0.0003(12) -0.0105(13) 0.0039(13) 
O21 0.0266(12) 0.0302(12) 0.0297(12) 0.0005(10) -0.0047(10) -0.0012(10) 
C22 0.0189(15) 0.0213(15) 0.0235(15) 0.0016(13) -0.0056(12) -0.0040(12) 
O22 0.0379(13) 0.0341(13) 0.0242(12) -0.0110(10) -0.0086(10) -0.0057(11) 
C23 0.0217(15) 0.0221(15) 0.0176(14) -0.0024(12) -0.0028(12) -0.0095(13) 
O23 0.0228(11) 0.0278(12) 0.0343(12) 0.0059(10) -0.0104(10) -0.0047(10) 
Cl1 0.0245(4) 0.0259(4) 0.0262(4) -0.0028(3) -0.0034(3) -0.0106(3) 
O31 0.081(2) 0.0506(18) 0.0499(18) -0.0165(15) -0.0162(17) 0.0007(16) 
C31 0.079(4) 0.110(4) 0.039(2) -0.010(3) 0.003(2) -0.059(3) 
C32 0.056(3) 0.0327(19) 0.041(2) -0.0008(17) -0.0113(19) -0.0038(18) 
C33 0.053(3) 0.050(3) 0.070(3) -0.012(2) 0.001(2) -0.011(2) 
 
_geom_special_details 
; 
 All esds (except the esd in the dihedral angle between two l.s. planes) 
 are estimated using the full covariance matrix.  The cell esds are taken 
 into account individually in the estimation of esds in distances, angles 
 and torsion angles; correlations between esds in cell parameters are only 
 used when they are defined by crystal symmetry.  An approximate (isotropic) 
 treatment of cell esds is used for estimating esds involving l.s. planes. 
; 
 
loop_ 
 _geom_bond_atom_site_label_1 
 _geom_bond_atom_site_label_2 
 _geom_bond_distance 
 _geom_bond_site_symmetry_2 
 _geom_bond_publ_flag 
Re1 C22 1.921(3) . ? 
Re1 C23 1.921(3) . ? 
Re1 C21 1.925(3) . ? 
Re1 N3 2.155(2) . ? 
Re1 N1 2.214(2) . ? 
Re1 Cl1 2.4791(7) . ? 
C1 N1 1.346(4) . ? 
C1 C2 1.378(4) . ? 
C1 H1 0.9500 . ? 
C2 C3 1.380(5) . ? 
C2 H2 0.9500 . ? 
C3 C4 1.385(4) . ? 
C3 H3 0.9500 . ? 
C4 C5 1.385(4) . ? 
C4 H4 0.9500 . ? 
C5 N1 1.353(4) . ? 
C5 C6 1.510(4) . ? 
C6 N2 1.462(3) . ? 
C6 H6A 0.9900 . ? 
C6 H6B 0.9900 . ? 
C7 N2 1.343(4) . ? 
C7 C8 1.366(4) . ? 
C7 H7 0.9500 . ? 
C8 N4 1.358(4) . ? 
C8 C9 1.497(4) . ? 
C9 N5 1.473(3) . ? 
C9 H9A 0.9900 . ? 
C9 H9B 0.9900 . ? 
C10 N6 1.327(4) . ? 
C10 N5 1.346(4) . ? 
C10 H10 0.9500 . ? 
C11 N6 1.356(4) . ? 
C11 C16 1.362(4) . ? 
C11 N7 1.375(4) . ? 
C12 N7 1.464(4) . ? 
C12 H12A 0.9800 . ? 
C12 H12B 0.9800 . ? 
C12 H12C 0.9800 . ? 
C13 O1 1.216(4) . ? 
C13 N7 1.376(4) . ? 
C13 N8 1.400(4) . ? 
C14 N8 1.467(4) . ? 
C14 H14A 0.9800 . ? 
C14 H14B 0.9800 . ? 
C14 H14C 0.9800 . ? 
C15 O2 1.222(4) . ? 
C15 N8 1.401(4) . ? 
C15 C16 1.429(4) . ? 
C16 N5 1.389(4) . ? 
N2 N3 1.341(3) . ? 
N3 N4 1.309(3) . ? 
C21 O21 1.104(4) . ? 
C22 O22 1.148(4) . ? 
C23 O23 1.148(4) . ? 
O31 C32 1.220(5) . ? 
C31 C32 1.473(6) . ? 
C31 H31A 0.9800 . ? 
C31 H31B 0.9800 . ? 
C31 H31C 0.9800 . ? 
C32 C33 1.486(6) . ? 
C33 H33A 0.9800 . ? 
C33 H33B 0.9800 . ? 
C33 H33C 0.9800 . ? 
 
loop_ 
 _geom_angle_atom_site_label_1 
 _geom_angle_atom_site_label_2 
 _geom_angle_atom_site_label_3 
 _geom_angle 
 _geom_angle_site_symmetry_1 
 _geom_angle_site_symmetry_3 
 _geom_angle_publ_flag 
C22 Re1 C23 88.49(12) . . ? 
C22 Re1 C21 87.78(12) . . ? 
C23 Re1 C21 92.85(12) . . ? 
C22 Re1 N3 177.11(10) . . ? 
C23 Re1 N3 93.32(10) . . ? 
C21 Re1 N3 94.37(11) . . ? 
C22 Re1 N1 95.97(10) . . ? 
C23 Re1 N1 172.12(10) . . ? 
C21 Re1 N1 93.81(10) . . ? 
N3 Re1 N1 81.98(8) . . ? 
C22 Re1 Cl1 94.12(9) . . ? 
C23 Re1 Cl1 88.71(9) . . ? 
C21 Re1 Cl1 177.58(9) . . ? 
N3 Re1 Cl1 83.68(6) . . ? 
N1 Re1 Cl1 84.50(6) . . ? 
N1 C1 C2 123.0(3) . . ? 
N1 C1 H1 118.5 . . ? 
C2 C1 H1 118.5 . . ? 
C1 C2 C3 119.4(3) . . ? 
C1 C2 H2 120.3 . . ? 
C3 C2 H2 120.3 . . ? 
C2 C3 C4 118.4(3) . . ? 
C2 C3 H3 120.8 . . ? 
C4 C3 H3 120.8 . . ? 
C5 C4 C3 119.5(3) . . ? 
C5 C4 H4 120.3 . . ? 
C3 C4 H4 120.3 . . ? 
N1 C5 C4 122.3(3) . . ? 
N1 C5 C6 118.1(2) . . ? 
C4 C5 C6 119.7(3) . . ? 
N2 C6 C5 111.1(2) . . ? 
N2 C6 H6A 109.4 . . ? 
C5 C6 H6A 109.4 . . ? 
N2 C6 H6B 109.4 . . ? 
C5 C6 H6B 109.4 . . ? 
H6A C6 H6B 108.0 . . ? 
N2 C7 C8 104.9(2) . . ? 
N2 C7 H7 127.6 . . ? 
C8 C7 H7 127.6 . . ? 
N4 C8 C7 109.2(2) . . ? 
N4 C8 C9 120.1(2) . . ? 
C7 C8 C9 130.7(3) . . ? 
N5 C9 C8 109.3(2) . . ? 
N5 C9 H9A 109.8 . . ? 
C8 C9 H9A 109.8 . . ? 
N5 C9 H9B 109.8 . . ? 
C8 C9 H9B 109.8 . . ? 
H9A C9 H9B 108.3 . . ? 
N6 C10 N5 113.2(3) . . ? 
N6 C10 H10 123.4 . . ? 
N5 C10 H10 123.4 . . ? 
N6 C11 C16 112.4(3) . . ? 
N6 C11 N7 125.4(3) . . ? 
C16 C11 N7 122.2(3) . . ? 
N7 C12 H12A 109.5 . . ? 
N7 C12 H12B 109.5 . . ? 
H12A C12 H12B 109.5 . . ? 
N7 C12 H12C 109.5 . . ? 
H12A C12 H12C 109.5 . . ? 
H12B C12 H12C 109.5 . . ? 
O1 C13 N7 121.7(3) . . ? 
O1 C13 N8 121.2(3) . . ? 
N7 C13 N8 117.2(3) . . ? 
N8 C14 H14A 109.5 . . ? 
N8 C14 H14B 109.5 . . ? 
H14A C14 H14B 109.5 . . ? 
N8 C14 H14C 109.5 . . ? 
H14A C14 H14C 109.5 . . ? 
H14B C14 H14C 109.5 . . ? 
O2 C15 N8 122.0(3) . . ? 
O2 C15 C16 126.6(3) . . ? 
N8 C15 C16 111.4(2) . . ? 
C11 C16 N5 104.6(2) . . ? 
C11 C16 C15 123.1(3) . . ? 
N5 C16 C15 132.3(3) . . ? 
C1 N1 C5 117.5(2) . . ? 
C1 N1 Re1 117.98(19) . . ? 
C5 N1 Re1 124.43(19) . . ? 
N3 N2 C7 109.7(2) . . ? 
N3 N2 C6 120.5(2) . . ? 
C7 N2 C6 129.8(2) . . ? 
N4 N3 N2 109.0(2) . . ? 
N4 N3 Re1 126.09(18) . . ? 
N2 N3 Re1 124.52(17) . . ? 
N3 N4 C8 107.2(2) . . ? 
C10 N5 C16 106.2(2) . . ? 
C10 N5 C9 125.9(2) . . ? 
C16 N5 C9 127.4(2) . . ? 
C10 N6 C11 103.6(2) . . ? 
C11 N7 C13 119.2(2) . . ? 
C11 N7 C12 120.6(3) . . ? 
C13 N7 C12 120.1(3) . . ? 
C13 N8 C15 127.0(2) . . ? 
C13 N8 C14 116.0(3) . . ? 
C15 N8 C14 116.9(2) . . ? 
O21 C21 Re1 177.7(3) . . ? 
O22 C22 Re1 178.4(3) . . ? 
O23 C23 Re1 176.6(3) . . ? 
C32 C31 H31A 109.5 . . ? 
C32 C31 H31B 109.5 . . ? 
H31A C31 H31B 109.5 . . ? 
C32 C31 H31C 109.5 . . ? 
H31A C31 H31C 109.5 . . ? 
H31B C31 H31C 109.5 . . ? 
O31 C32 C31 121.6(4) . . ? 
O31 C32 C33 122.5(4) . . ? 
C31 C32 C33 115.8(4) . . ? 
C32 C33 H33A 109.5 . . ? 
C32 C33 H33B 109.5 . . ? 
H33A C33 H33B 109.5 . . ? 
C32 C33 H33C 109.5 . . ? 
H33A C33 H33C 109.5 . . ? 
H33B C33 H33C 109.5 . . ? 
 
_diffrn_measured_fraction_theta_max    0.996 
_diffrn_reflns_theta_full              26.45 
_diffrn_measured_fraction_theta_full   0.996 
_refine_diff_density_max    1.243 
_refine_diff_density_min   -0.653 
_refine_diff_density_rms    0.111 


data_jdc533b 
 
_audit_creation_method            SHELXL-97 
_chemical_name_systematic 
; 
 ? 
; 
_chemical_name_common             ? 
_chemical_melting_point           ? 
_chemical_formula_moiety          'C18 H14 Cl N4 O3 Re, C H4 O' 
_chemical_formula_sum 
 'C19 H18 Cl N4 O4 Re' 
_chemical_formula_weight          588.02 
 
loop_ 
 _atom_type_symbol 
 _atom_type_description 
 _atom_type_scat_dispersion_real 
 _atom_type_scat_dispersion_imag 
 _atom_type_scat_source 
 'C'  'C'   0.0033   0.0016 
 'International Tables Vol C Tables 4.2.6.8 and 6.1.1.4' 
 'H'  'H'   0.0000   0.0000 
 'International Tables Vol C Tables 4.2.6.8 and 6.1.1.4' 
 'N'  'N'   0.0061   0.0033 
 'International Tables Vol C Tables 4.2.6.8 and 6.1.1.4' 
 'O'  'O'   0.0106   0.0060 
 'International Tables Vol C Tables 4.2.6.8 and 6.1.1.4' 
 'Cl'  'Cl'   0.1484   0.1585 
 'International Tables Vol C Tables 4.2.6.8 and 6.1.1.4' 
 'Re'  'Re'  -1.0185   7.2310 
 'International Tables Vol C Tables 4.2.6.8 and 6.1.1.4' 
 
_symmetry_cell_setting             'Triclinic'
_symmetry_space_group_name_H-M   'P-1   '
_symmetry_space_group_name_Hall '-P 1'  
 
loop_ 
 _symmetry_equiv_pos_as_xyz 
 'x, y, z' 
 '-x, -y, -z' 
 
_cell_length_a                    7.449(2) 
_cell_length_b                    8.1630(19) 
_cell_length_c                    17.482(4) 
_cell_angle_alpha                 76.774(13) 
_cell_angle_beta                  88.194(12) 
_cell_angle_gamma                 82.644(12) 
_cell_volume                      1026.2(4) 
_cell_formula_units_Z             2 
_cell_measurement_temperature     93(2) 
_cell_measurement_reflns_used      5718
_cell_measurement_theta_min        2.58
_cell_measurement_theta_max       29.74 
 
_exptl_crystal_description        'needle'
_exptl_crystal_colour            'colourless' 
_exptl_crystal_size_max           0.51 
_exptl_crystal_size_mid           0.09 
_exptl_crystal_size_min           0.03 
_exptl_crystal_density_meas       ? 
_exptl_crystal_density_diffrn     1.903 
_exptl_crystal_density_method     'not measured' 
_exptl_crystal_F_000              568 
_exptl_absorpt_coefficient_mu     6.084 
_exptl_absorpt_correction_type    'multi-scan' 
_exptl_absorpt_correction_T_min   0.1474 
_exptl_absorpt_correction_T_max   0.8386 
_exptl_absorpt_process_details    'SADABS (Bruker, 2004)'
 
_exptl_special_details 
; 
 ? 
; 
 
_diffrn_ambient_temperature       93(2) 
_diffrn_radiation_wavelength      0.71073 
_diffrn_radiation_type            MoK\a 
_diffrn_radiation_source          'fine-focus sealed tube' 
_diffrn_radiation_monochromator   graphite 
_diffrn_measurement_device_type   'Bruker APEXII CCD area detector' 
_diffrn_measurement_method        'phi and omega scans'
_diffrn_detector_area_resol_mean  ? 
_diffrn_standards_number          0
_diffrn_standards_interval_count  ? 
_diffrn_standards_interval_time   ? 
_diffrn_standards_decay_%         ? 
_diffrn_reflns_number             17048 
_diffrn_reflns_av_R_equivalents   0.0899 
_diffrn_reflns_av_sigmaI/netI     0.1167 
_diffrn_reflns_limit_h_min        -5 
_diffrn_reflns_limit_h_max        10 
_diffrn_reflns_limit_k_min        -10 
_diffrn_reflns_limit_k_max        11 
_diffrn_reflns_limit_l_min        -24 
_diffrn_reflns_limit_l_max        24 
_diffrn_reflns_theta_min          1.20 
_diffrn_reflns_theta_max          30.32 
_reflns_number_total              5829 
_reflns_number_gt                 4533 
_reflns_threshold_expression      >2sigma(I) 
 
_computing_data_collection      'Bruker APEX2'
_computing_cell_refinement      'Bruker SAINT'
_computing_data_reduction       'Bruker SAINT'  
_computing_structure_solution   'SHELXS-97 (Sheldrick, 2008)'
_computing_structure_refinement 'SHELXL-97 (Sheldrick, 2008)'
_computing_molecular_graphics   'Bruker SHELXTL'
_computing_publication_material 'Bruker SHELXTL' 
 
_refine_special_details 
; 
 Refinement of F^2^ against ALL reflections.  The weighted R-factor wR and 
 goodness of fit S are based on F^2^, conventional R-factors R are based 
 on F, with F set to zero for negative F^2^. The threshold expression of 
 F^2^ > 2sigma(F^2^) is used only for calculating R-factors(gt) etc. and is 
 not relevant to the choice of reflections for refinement.  R-factors based 
 on F^2^ are statistically about twice as large as those based on F, and R- 
 factors based on ALL data will be even larger. 

 Some disorder of the phenyl ring of the benzyl ligand substituent was observed.
 Attempts to model this disorder as two parts were unsuccessful. Instead
 the anisotropic displacement parameters of the phenyl ring carbon atoms
 were restrained using the SIMU command.

; 
 
_refine_ls_structure_factor_coef  Fsqd  
_refine_ls_matrix_type            full 
_refine_ls_weighting_scheme       calc  
_refine_ls_weighting_details 
 'calc w=1/[\s^2^(Fo^2^)+(0.1362P)^2^+0.0000P] where P=(Fo^2^+2Fc^2^)/3' 
_atom_sites_solution_primary      direct 
_atom_sites_solution_secondary    difmap 
_atom_sites_solution_hydrogens    geom 
_refine_ls_hydrogen_treatment     constr
_refine_ls_extinction_method      none 
_refine_ls_extinction_coef        ? 
_refine_ls_number_reflns          5829 
_refine_ls_number_parameters      251 
_refine_ls_number_restraints      36 
_refine_ls_R_factor_all           0.0972 
_refine_ls_R_factor_gt            0.0689 
_refine_ls_wR_factor_ref          0.2126 
_refine_ls_wR_factor_gt           0.1816 
_refine_ls_goodness_of_fit_ref    1.027 
_refine_ls_restrained_S_all       1.029 
_refine_ls_shift/su_max           0.000 
_refine_ls_shift/su_mean          0.000 
 
loop_ 
 _atom_site_label 
 _atom_site_type_symbol 
 _atom_site_fract_x 
 _atom_site_fract_y 
 _atom_site_fract_z 
 _atom_site_U_iso_or_equiv 
 _atom_site_adp_type 
 _atom_site_occupancy 
 _atom_site_symmetry_multiplicity 
 _atom_site_calc_flag 
 _atom_site_refinement_flags 
 _atom_site_disorder_assembly 
 _atom_site_disorder_group 
Cl1 Cl 0.4661(3) 0.0903(3) 0.37926(16) 0.0209(5) Uani 1 1 d . . . 
Re1 Re 0.28775(4) 0.37151(4) 0.33051(2) 0.01506(16) Uani 1 1 d . . . 
C1 C 0.1926(14) 0.2441(13) 0.5064(6) 0.019(2) Uani 1 1 d . . . 
H1 H 0.3178 0.2524 0.5107 0.023 Uiso 1 1 calc R . . 
C2 C 0.0923(14) 0.1881(13) 0.5746(6) 0.021(2) Uani 1 1 d . . . 
H2 H 0.1471 0.1672 0.6248 0.025 Uiso 1 1 calc R . . 
C3 C -0.0858(14) 0.1635(13) 0.5685(6) 0.021(2) Uani 1 1 d . . . 
H3 H -0.1543 0.1234 0.6142 0.025 Uiso 1 1 calc R . . 
C4 C -0.1639(15) 0.1984(13) 0.4943(7) 0.023(2) Uani 1 1 d . . . 
H4 H -0.2859 0.1811 0.4884 0.028 Uiso 1 1 calc R . . 
C5 C -0.0603(12) 0.2588(12) 0.4295(6) 0.0149(18) Uani 1 1 d . . . 
C6 C -0.1494(13) 0.3090(13) 0.3483(6) 0.019(2) Uani 1 1 d . . . 
H6A H -0.2754 0.2811 0.3538 0.023 Uiso 1 1 calc R . . 
H6B H -0.1548 0.4334 0.3288 0.023 Uiso 1 1 calc R . . 
C7 C -0.1222(14) 0.1439(14) 0.2391(6) 0.020(2) Uani 1 1 d . . . 
H7 H -0.2428 0.1189 0.2368 0.024 Uiso 1 1 calc R . . 
C8 C 0.0187(13) 0.1050(12) 0.1925(6) 0.0169(19) Uani 1 1 d . . . 
C9 C 0.0235(15) 0.0232(13) 0.1230(6) 0.022(2) Uani 1 1 d . . . 
H9A H -0.0725 -0.0522 0.1288 0.027 Uiso 1 1 calc R . . 
H9B H 0.1418 -0.0464 0.1210 0.027 Uiso 1 1 calc R . . 
C10 C -0.0054(13) 0.1592(10) 0.0475(4) 0.036(2) Uani 1 1 d GU . . 
C11 C -0.1825(12) 0.2247(12) 0.0254(5) 0.048(3) Uani 1 1 d GU . . 
H11 H -0.2806 0.1808 0.0560 0.058 Uiso 1 1 calc R . . 
C12 C -0.2161(14) 0.3545(12) -0.0413(6) 0.068(4) Uani 1 1 d GU . . 
H12 H -0.3372 0.3993 -0.0564 0.081 Uiso 1 1 calc R . . 
C13 C -0.0727(19) 0.4187(11) -0.0861(5) 0.070(4) Uani 1 1 d GU . . 
H13 H -0.0957 0.5074 -0.1317 0.084 Uiso 1 1 calc R . . 
C14 C 0.1045(16) 0.3532(12) -0.0641(5) 0.065(3) Uani 1 1 d GU . . 
H14 H 0.2025 0.3971 -0.0946 0.078 Uiso 1 1 calc R . . 
C15 C 0.1381(11) 0.2234(12) 0.0027(6) 0.048(3) Uani 1 1 d GU . . 
H15 H 0.2592 0.1786 0.0178 0.058 Uiso 1 1 calc R . . 
C16 C 0.1399(14) 0.5834(13) 0.2905(6) 0.019(2) Uani 1 1 d . . . 
C17 C 0.4275(16) 0.4994(14) 0.3828(6) 0.022(2) Uani 1 1 d . . . 
C18 C 0.4436(14) 0.4218(14) 0.2395(7) 0.023(2) Uani 1 1 d . . . 
N1 N 0.1132(12) 0.2869(11) 0.4336(5) 0.0186(17) Uani 1 1 d . . . 
N2 N -0.0563(11) 0.2261(10) 0.2898(6) 0.0187(17) Uani 1 1 d . . . 
N3 N 0.1244(12) 0.2298(11) 0.2740(5) 0.0191(18) Uani 1 1 d . . . 
N4 N 0.1688(11) 0.1582(12) 0.2160(5) 0.0214(18) Uani 1 1 d . . . 
O1 O 0.0530(11) 0.7089(10) 0.2662(5) 0.0255(16) Uani 1 1 d . . . 
O2 O 0.5165(11) 0.5739(10) 0.4098(5) 0.0288(18) Uani 1 1 d . . . 
O3 O 0.5390(11) 0.4476(10) 0.1862(5) 0.0276(17) Uani 1 1 d . . . 
C19 C 0.5380(18) 0.8555(18) 0.2080(12) 0.053(5) Uani 1 1 d . . . 
H19A H 0.6612 0.7979 0.2056 0.063 Uiso 1 1 calc R . . 
H19B H 0.4559 0.8072 0.1789 0.063 Uiso 1 1 calc R . . 
H19C H 0.4986 0.8399 0.2629 0.063 Uiso 1 1 calc R . . 
O19 O 0.5354(11) 1.0308(11) 0.1740(6) 0.035(2) Uani 1 1 d . . . 
H19D H 0.4275 1.0686 0.1865 0.042 Uiso 1 1 d . . . 
 
loop_ 
 _atom_site_aniso_label 
 _atom_site_aniso_U_11 
 _atom_site_aniso_U_22 
 _atom_site_aniso_U_33 
 _atom_site_aniso_U_23 
 _atom_site_aniso_U_13 
 _atom_site_aniso_U_12 
Cl1 0.0178(10) 0.0221(11) 0.0219(13) -0.0014(9) -0.0049(9) -0.0049(8) 
Re1 0.0149(2) 0.0173(2) 0.0138(2) -0.00294(15) -0.00343(15) -0.00511(14) 
C1 0.021(5) 0.024(5) 0.016(5) -0.010(4) -0.006(4) -0.008(4) 
C2 0.025(5) 0.027(5) 0.013(5) -0.006(4) 0.001(4) -0.008(4) 
C3 0.023(5) 0.024(5) 0.015(5) -0.001(4) 0.000(4) -0.012(4) 
C4 0.024(5) 0.022(5) 0.025(6) -0.004(4) -0.007(4) -0.010(4) 
C5 0.014(4) 0.018(4) 0.013(5) -0.005(4) 0.002(3) -0.002(3) 
C6 0.014(4) 0.028(5) 0.017(5) -0.005(4) -0.002(4) -0.008(4) 
C7 0.020(4) 0.031(5) 0.014(5) -0.010(4) -0.004(4) -0.008(4) 
C8 0.022(5) 0.018(4) 0.013(5) -0.006(4) -0.006(4) -0.005(4) 
C9 0.032(5) 0.019(5) 0.021(5) -0.012(4) -0.008(4) -0.003(4) 
C10 0.070(7) 0.026(5) 0.019(5) -0.010(4) 0.004(5) -0.019(5) 
C11 0.085(7) 0.033(5) 0.031(6) -0.016(5) -0.015(6) -0.002(5) 
C12 0.118(9) 0.043(6) 0.043(7) -0.016(5) -0.027(6) 0.004(6) 
C13 0.129(9) 0.042(6) 0.045(7) -0.021(5) -0.010(7) -0.016(7) 
C14 0.119(8) 0.044(6) 0.043(7) -0.020(5) 0.012(6) -0.039(6) 
C15 0.088(7) 0.040(5) 0.030(5) -0.022(4) 0.014(5) -0.034(5) 
C16 0.021(5) 0.027(5) 0.013(5) -0.011(4) 0.001(4) -0.011(4) 
C17 0.033(6) 0.022(5) 0.010(5) 0.005(4) -0.003(4) -0.010(4) 
C18 0.020(5) 0.024(5) 0.024(6) -0.001(4) -0.002(4) -0.010(4) 
N1 0.022(4) 0.018(4) 0.017(4) -0.002(3) -0.006(3) -0.009(3) 
N2 0.015(4) 0.017(4) 0.027(5) -0.007(3) -0.004(3) -0.005(3) 
N3 0.024(4) 0.022(4) 0.016(4) -0.007(3) -0.008(3) -0.013(3) 
N4 0.018(4) 0.032(5) 0.016(4) -0.007(4) -0.006(3) -0.005(3) 
O1 0.029(4) 0.028(4) 0.019(4) -0.006(3) 0.002(3) 0.000(3) 
O2 0.033(4) 0.034(4) 0.025(4) -0.012(4) -0.004(3) -0.018(3) 
O3 0.031(4) 0.026(4) 0.025(4) -0.004(3) 0.006(3) -0.003(3) 
C19 0.025(6) 0.035(7) 0.099(15) -0.018(8) 0.004(7) -0.004(5) 
O19 0.025(4) 0.039(5) 0.044(6) -0.010(4) 0.003(4) -0.015(4) 
 
_geom_special_details 
; 
 All esds (except the esd in the dihedral angle between two l.s. planes) 
 are estimated using the full covariance matrix.  The cell esds are taken 
 into account individually in the estimation of esds in distances, angles 
 and torsion angles; correlations between esds in cell parameters are only 
 used when they are defined by crystal symmetry.  An approximate (isotropic) 
 treatment of cell esds is used for estimating esds involving l.s. planes. 
; 
 
loop_ 
 _geom_bond_atom_site_label_1 
 _geom_bond_atom_site_label_2 
 _geom_bond_distance 
 _geom_bond_site_symmetry_2 
 _geom_bond_publ_flag 
Cl1 Re1 2.481(3) . ? 
Re1 C16 1.924(11) . ? 
Re1 C18 1.937(12) . ? 
Re1 C17 1.946(11) . ? 
Re1 N3 2.180(7) . ? 
Re1 N1 2.220(9) . ? 
C1 N1 1.371(12) . ? 
C1 C2 1.404(15) . ? 
C1 H1 0.9500 . ? 
C2 C3 1.378(14) . ? 
C2 H2 0.9500 . ? 
C3 C4 1.391(14) . ? 
C3 H3 0.9500 . ? 
C4 C5 1.382(15) . ? 
C4 H4 0.9500 . ? 
C5 N1 1.348(12) . ? 
C5 C6 1.532(13) . ? 
C6 N2 1.462(14) . ? 
C6 H6A 0.9900 . ? 
C6 H6B 0.9900 . ? 
C7 C8 1.358(15) . ? 
C7 N2 1.364(12) . ? 
C7 H7 0.9500 . ? 
C8 N4 1.357(12) . ? 
C8 C9 1.512(13) . ? 
C9 C10 1.519(13) . ? 
C9 H9A 0.9900 . ? 
C9 H9B 0.9900 . ? 
C10 C11 1.3900 . ? 
C10 C15 1.3900 . ? 
C11 C12 1.3900 . ? 
C11 H11 0.9500 . ? 
C12 C13 1.3900 . ? 
C12 H12 0.9500 . ? 
C13 C14 1.3900 . ? 
C13 H13 0.9500 . ? 
C14 C15 1.3900 . ? 
C14 H14 0.9500 . ? 
C15 H15 0.9500 . ? 
C16 O1 1.139(13) . ? 
C17 O2 1.135(13) . ? 
C18 O3 1.152(14) . ? 
N2 N3 1.368(12) . ? 
N3 N4 1.296(13) . ? 
C19 O19 1.416(17) . ? 
C19 H19A 0.9800 . ? 
C19 H19B 0.9800 . ? 
C19 H19C 0.9800 . ? 
O19 H19D 0.8632 . ? 
 
loop_ 
 _geom_angle_atom_site_label_1 
 _geom_angle_atom_site_label_2 
 _geom_angle_atom_site_label_3 
 _geom_angle 
 _geom_angle_site_symmetry_1 
 _geom_angle_site_symmetry_3 
 _geom_angle_publ_flag 
C16 Re1 C18 88.8(4) . . ? 
C16 Re1 C17 86.3(4) . . ? 
C18 Re1 C17 88.8(5) . . ? 
C16 Re1 N3 93.0(4) . . ? 
C18 Re1 N3 92.7(4) . . ? 
C17 Re1 N3 178.3(4) . . ? 
C16 Re1 N1 95.7(4) . . ? 
C18 Re1 N1 174.2(4) . . ? 
C17 Re1 N1 95.1(4) . . ? 
N3 Re1 N1 83.5(3) . . ? 
C16 Re1 Cl1 176.9(3) . . ? 
C18 Re1 Cl1 91.7(3) . . ? 
C17 Re1 Cl1 96.8(3) . . ? 
N3 Re1 Cl1 83.9(2) . . ? 
N1 Re1 Cl1 83.6(2) . . ? 
N1 C1 C2 121.2(9) . . ? 
N1 C1 H1 119.4 . . ? 
C2 C1 H1 119.4 . . ? 
C3 C2 C1 119.8(9) . . ? 
C3 C2 H2 120.1 . . ? 
C1 C2 H2 120.1 . . ? 
C2 C3 C4 119.0(10) . . ? 
C2 C3 H3 120.5 . . ? 
C4 C3 H3 120.5 . . ? 
C5 C4 C3 118.7(9) . . ? 
C5 C4 H4 120.7 . . ? 
C3 C4 H4 120.7 . . ? 
N1 C5 C4 123.8(9) . . ? 
N1 C5 C6 117.2(8) . . ? 
C4 C5 C6 118.8(8) . . ? 
N2 C6 C5 114.3(8) . . ? 
N2 C6 H6A 108.7 . . ? 
C5 C6 H6A 108.7 . . ? 
N2 C6 H6B 108.7 . . ? 
C5 C6 H6B 108.7 . . ? 
H6A C6 H6B 107.6 . . ? 
C8 C7 N2 106.3(8) . . ? 
C8 C7 H7 126.8 . . ? 
N2 C7 H7 126.8 . . ? 
N4 C8 C7 108.6(9) . . ? 
N4 C8 C9 121.4(9) . . ? 
C7 C8 C9 129.9(8) . . ? 
C8 C9 C10 109.8(8) . . ? 
C8 C9 H9A 109.7 . . ? 
C10 C9 H9A 109.7 . . ? 
C8 C9 H9B 109.7 . . ? 
C10 C9 H9B 109.7 . . ? 
H9A C9 H9B 108.2 . . ? 
C11 C10 C15 120.0 . . ? 
C11 C10 C9 117.7(7) . . ? 
C15 C10 C9 122.2(7) . . ? 
C10 C11 C12 120.0 . . ? 
C10 C11 H11 120.0 . . ? 
C12 C11 H11 120.0 . . ? 
C13 C12 C11 120.0 . . ? 
C13 C12 H12 120.0 . . ? 
C11 C12 H12 120.0 . . ? 
C14 C13 C12 120.0 . . ? 
C14 C13 H13 120.0 . . ? 
C12 C13 H13 120.0 . . ? 
C13 C14 C15 120.0 . . ? 
C13 C14 H14 120.0 . . ? 
C15 C14 H14 120.0 . . ? 
C14 C15 C10 120.0 . . ? 
C14 C15 H15 120.0 . . ? 
C10 C15 H15 120.0 . . ? 
O1 C16 Re1 179.5(10) . . ? 
O2 C17 Re1 175.9(11) . . ? 
O3 C18 Re1 178.2(10) . . ? 
C5 N1 C1 117.4(9) . . ? 
C5 N1 Re1 124.8(7) . . ? 
C1 N1 Re1 117.5(7) . . ? 
C7 N2 N3 107.2(8) . . ? 
C7 N2 C6 130.4(8) . . ? 
N3 N2 C6 122.2(8) . . ? 
N4 N3 N2 109.4(7) . . ? 
N4 N3 Re1 128.2(7) . . ? 
N2 N3 Re1 121.8(7) . . ? 
N3 N4 C8 108.4(9) . . ? 
O19 C19 H19A 109.5 . . ? 
O19 C19 H19B 109.5 . . ? 
H19A C19 H19B 109.5 . . ? 
O19 C19 H19C 109.5 . . ? 
H19A C19 H19C 109.5 . . ? 
H19B C19 H19C 109.5 . . ? 
C19 O19 H19D 100.6 . . ? 
 
_diffrn_measured_fraction_theta_max    0.943 
_diffrn_reflns_theta_full              30.32 
_diffrn_measured_fraction_theta_full   0.943 
_refine_diff_density_max    3.252 
_refine_diff_density_min   -5.578 
_refine_diff_density_rms    0.521 


data_cba162 
 
_audit_creation_method            SHELXL-97 
_chemical_name_systematic 
; 
 ? 
; 
_chemical_name_common             ? 
_chemical_melting_point           ? 
_chemical_formula_moiety          'C17 H12 Cl N4 O3 Re, 0.13(C2 H8 O2)' 
_chemical_formula_sum 
 'C17.25 H13 Cl N4 O3.25 Re' 
_chemical_formula_weight          549.97 
 
loop_ 
 _atom_type_symbol 
 _atom_type_description 
 _atom_type_scat_dispersion_real 
 _atom_type_scat_dispersion_imag 
 _atom_type_scat_source 
 'C'  'C'   0.0033   0.0016 
 'International Tables Vol C Tables 4.2.6.8 and 6.1.1.4' 
 'H'  'H'   0.0000   0.0000 
 'International Tables Vol C Tables 4.2.6.8 and 6.1.1.4' 
 'N'  'N'   0.0061   0.0033 
 'International Tables Vol C Tables 4.2.6.8 and 6.1.1.4' 
 'O'  'O'   0.0106   0.0060 
 'International Tables Vol C Tables 4.2.6.8 and 6.1.1.4' 
 'Cl'  'Cl'   0.1484   0.1585 
 'International Tables Vol C Tables 4.2.6.8 and 6.1.1.4' 
 'Re'  'Re'  -1.0185   7.2310 
 'International Tables Vol C Tables 4.2.6.8 and 6.1.1.4' 
 
_symmetry_cell_setting            'Triclinic'
_symmetry_space_group_name_H-M   'P-1'
_symmetry_space_group_name_Hall '-P 1'  
 
loop_ 
 _symmetry_equiv_pos_as_xyz 
 'x, y, z' 
 '-x, -y, -z' 
 
_cell_length_a                    7.5568(6) 
_cell_length_b                    9.5664(9) 
_cell_length_c                    13.4313(12) 
_cell_angle_alpha                 84.932(4) 
_cell_angle_beta                  83.901(4) 
_cell_angle_gamma                 69.692(4) 
_cell_volume                      904.08(14) 
_cell_formula_units_Z             2 
_cell_measurement_temperature     89(2) 
_cell_measurement_reflns_used     9916
_cell_measurement_theta_min        2.27
_cell_measurement_theta_max       26.44 
 
_exptl_crystal_description        'Block'
_exptl_crystal_colour            'colourless'
_exptl_crystal_size_max           0.45 
_exptl_crystal_size_mid           0.30 
_exptl_crystal_size_min           0.09 
_exptl_crystal_density_meas       ? 
_exptl_crystal_density_diffrn     2.020 
_exptl_crystal_density_method     'not measured' 
_exptl_crystal_F_000              525 
_exptl_absorpt_coefficient_mu     6.895 
_exptl_absorpt_correction_type    'multi-scan'
_exptl_absorpt_correction_T_min   0.1474 
_exptl_absorpt_correction_T_max   0.5758 
_exptl_absorpt_process_details    'SADABS (Bruker, 2004)' 
 
_exptl_special_details 
; 
 ? 
; 
 
_diffrn_ambient_temperature       89(2) 
_diffrn_radiation_wavelength      0.71073 
_diffrn_radiation_type            MoK\a 
_diffrn_radiation_source          'fine-focus sealed tube' 
_diffrn_radiation_monochromator   graphite 
_diffrn_measurement_device_type   'Bruker APEXII CCD area detector' 
_diffrn_measurement_method        'phi and omega scans'
_diffrn_detector_area_resol_mean  ? 
_diffrn_standards_number          0
_diffrn_standards_interval_count  ? 
_diffrn_standards_interval_time   ? 
_diffrn_standards_decay_%         ? 
_diffrn_reflns_number             17294 
_diffrn_reflns_av_R_equivalents   0.0523 
_diffrn_reflns_av_sigmaI/netI     0.0429 
_diffrn_reflns_limit_h_min        -9 
_diffrn_reflns_limit_h_max        9 
_diffrn_reflns_limit_k_min        -11 
_diffrn_reflns_limit_k_max        11 
_diffrn_reflns_limit_l_min        -16 
_diffrn_reflns_limit_l_max        16 
_diffrn_reflns_theta_min          1.53 
_diffrn_reflns_theta_max          26.44 
_reflns_number_total              3685 
_reflns_number_gt                 3462 
_reflns_threshold_expression      >2sigma(I) 
 
_computing_data_collection      'Bruker APEX2'
_computing_cell_refinement      'Bruker SAINT'
_computing_data_reduction       'Bruker SAINT' 
_computing_structure_solution   'SHELXS-97 (Sheldrick, 2008)'
_computing_structure_refinement 'SHELXL-97 (Sheldrick, 2008)'
_computing_molecular_graphics   'Bruker SHELXTL'
_computing_publication_material 'Bruker SHELXTL' 
 
_refine_special_details 
; 
 Refinement of F^2^ against ALL reflections.  The weighted R-factor wR and 
 goodness of fit S are based on F^2^, conventional R-factors R are based 
 on F, with F set to zero for negative F^2^. The threshold expression of 
 F^2^ > 2sigma(F^2^) is used only for calculating R-factors(gt) etc. and is 
 not relevant to the choice of reflections for refinement.  R-factors based 
 on F^2^ are statistically about twice as large as those based on F, and R- 
 factors based on ALL data will be even larger. 

 There is a quarter-occupancy methanol molecule in the asymmetric unit of
 the structure. A second molecule of methanol is generated by symmetry from
 an adjacent unit cell. These two solvent molecules are not present in the
 crystal at the same time but rather represent a half occupancy methanol
 molecule disorded over two sites. It was necessary to use ISOR restraint
 on the carbon atom of the methanol molecule (C50) to prevent it becoming NPD.

 The phenyl ligand substituent was modeled as being disorded over two
 sites of equal occupancy (50:50), with the pivotal atom being the
 C8 of the triazolyl moiety. Several of the carbon atoms on both parts of
 the disordered phenyl ring were NPD, thus SIMU restraint was employed
 equalise the ADPs.


; 
 
_refine_ls_structure_factor_coef  Fsqd  
_refine_ls_matrix_type            full 
_refine_ls_weighting_scheme       calc  
_refine_ls_weighting_details 
 'calc w=1/[\s^2^(Fo^2^)+(0.0622P)^2^+1.2908P] where P=(Fo^2^+2Fc^2^)/3' 
_atom_sites_solution_primary      direct 
_atom_sites_solution_secondary    difmap 
_atom_sites_solution_hydrogens    geom 
_refine_ls_hydrogen_treatment     constr
_refine_ls_extinction_method      none 
_refine_ls_extinction_coef        ? 
_refine_ls_number_reflns          3685 
_refine_ls_number_parameters      309 
_refine_ls_number_restraints      78 
_refine_ls_R_factor_all           0.0377 
_refine_ls_R_factor_gt            0.0341 
_refine_ls_wR_factor_ref          0.1031 
_refine_ls_wR_factor_gt           0.0921 
_refine_ls_goodness_of_fit_ref    1.135 
_refine_ls_restrained_S_all       1.129 
_refine_ls_shift/su_max           0.001 
_refine_ls_shift/su_mean          0.000 
 
loop_ 
 _atom_site_label 
 _atom_site_type_symbol 
 _atom_site_fract_x 
 _atom_site_fract_y 
 _atom_site_fract_z 
 _atom_site_U_iso_or_equiv 
 _atom_site_adp_type 
 _atom_site_occupancy 
 _atom_site_symmetry_multiplicity 
 _atom_site_calc_flag 
 _atom_site_refinement_flags 
 _atom_site_disorder_assembly 
 _atom_site_disorder_group 
Re1 Re 0.66399(3) 0.73321(2) 0.867148(15) 0.02173(12) Uani 1 1 d . . . 
Cl1 Cl 0.8126(3) 0.8062(2) 0.70738(15) 0.0443(5) Uani 1 1 d . . . 
N3 N 0.5522(7) 0.6138(6) 0.7755(4) 0.0204(10) Uani 1 1 d . . . 
N2 N 0.3663(7) 0.6468(6) 0.7692(4) 0.0231(10) Uani 1 1 d . . . 
N1 N 0.4163(7) 0.9232(6) 0.8238(4) 0.0178(10) Uani 1 1 d . . . 
C22 C 0.7637(10) 0.8505(9) 0.9391(6) 0.0354(16) Uani 1 1 d . . . 
O22 O 0.8248(7) 0.9223(6) 0.9794(4) 0.0456(13) Uani 1 1 d . . . 
C4 C 0.0907(9) 1.0320(7) 0.7844(6) 0.0398(17) Uani 1 1 d . . . 
H4 H -0.0253 1.0190 0.7749 0.048 Uiso 1 1 calc R . . 
C1 C 0.4306(9) 1.0602(7) 0.8080(4) 0.0266(13) Uani 1 1 d . . . 
H1 H 0.5496 1.0706 0.8137 0.032 Uiso 1 1 calc R . . 
C5 C 0.2455(8) 0.9107(7) 0.8116(5) 0.0245(13) Uani 1 1 d . . . 
C2 C 0.2805(11) 1.1856(8) 0.7839(5) 0.0374(16) Uani 1 1 d . . . 
H2 H 0.2958 1.2805 0.7761 0.045 Uiso 1 1 calc R . . 
C7 C 0.3371(11) 0.5607(7) 0.7031(6) 0.0382(17) Uani 1 1 d . A . 
H7 H 0.2195 0.5609 0.6840 0.046 Uiso 1 1 calc R . . 
C8 C 0.5169(12) 0.4719(7) 0.6692(5) 0.0345(16) Uani 1 1 d . . . 
C3 C 0.1070(11) 1.1734(8) 0.7710(6) 0.0442(19) Uani 1 1 d . . . 
H3 H 0.0025 1.2587 0.7536 0.053 Uiso 1 1 calc R . . 
N4 N 0.6451(8) 0.5067(6) 0.7146(4) 0.0308(12) Uani 1 1 d . A . 
C9 C 0.524(3) 0.3578(19) 0.6005(12) 0.031(3) Uani 0.50 1 d PU A 1 
C10 C 0.377(3) 0.3388(17) 0.5601(10) 0.030(2) Uani 0.50 1 d PU A 1 
H10 H 0.2512 0.4002 0.5795 0.037 Uiso 0.50 1 calc PR A 1 
C11 C 0.407(3) 0.2298(17) 0.4898(10) 0.039(3) Uani 0.50 1 d PU A 1 
H11 H 0.3041 0.2155 0.4620 0.047 Uiso 0.50 1 calc PR A 1 
C12 C 0.598(4) 0.143(2) 0.4630(14) 0.043(4) Uani 0.50 1 d PU A 1 
H12 H 0.6231 0.0660 0.4177 0.052 Uiso 0.50 1 calc PR A 1 
C13 C 0.743(3) 0.165(2) 0.4996(15) 0.055(4) Uani 0.50 1 d PU A 1 
H13 H 0.8698 0.1090 0.4777 0.066 Uiso 0.50 1 calc PR A 1 
C14 C 0.706(3) 0.274(2) 0.5713(12) 0.048(3) Uani 0.50 1 d PU A 1 
H14 H 0.8082 0.2885 0.5993 0.057 Uiso 0.50 1 calc PR A 1 
C109 C 0.610(2) 0.3527(17) 0.5920(11) 0.020(2) Uani 0.50 1 d PU A 2 
C110 C 0.488(2) 0.2983(16) 0.5530(10) 0.024(2) Uani 0.50 1 d PU A 2 
H110 H 0.3565 0.3381 0.5739 0.029 Uiso 0.50 1 calc PR A 2 
C111 C 0.547(3) 0.188(2) 0.4844(13) 0.030(3) Uani 0.50 1 d PU A 2 
H111 H 0.4590 0.1527 0.4580 0.037 Uiso 0.50 1 calc PR A 2 
C112 C 0.745(2) 0.1282(17) 0.4549(11) 0.033(3) Uani 0.50 1 d PU A 2 
H112 H 0.7910 0.0523 0.4081 0.039 Uiso 0.50 1 calc PR A 2 
C113 C 0.871(2) 0.1814(14) 0.4947(9) 0.027(2) Uani 0.50 1 d PU A 2 
H113 H 1.0032 0.1407 0.4762 0.032 Uiso 0.50 1 calc PR A 2 
C114 C 0.804(2) 0.2922(14) 0.5603(9) 0.022(2) Uani 0.50 1 d PU A 2 
H114 H 0.8899 0.3300 0.5854 0.026 Uiso 0.50 1 calc PR A 2 
C6 C 0.2266(8) 0.7595(7) 0.8310(6) 0.0313(15) Uani 1 1 d . . . 
H6A H 0.2423 0.7279 0.9027 0.038 Uiso 1 1 calc R . . 
H6B H 0.0978 0.7661 0.8172 0.038 Uiso 1 1 calc R . . 
C21 C 0.8854(12) 0.5654(10) 0.8868(7) 0.053(2) Uani 1 1 d . . . 
O21 O 1.0206(10) 0.4616(8) 0.8952(7) 0.087(3) Uani 1 1 d . . . 
C23 C 0.5514(12) 0.6779(8) 0.9912(5) 0.0398(17) Uani 1 1 d . . . 
O23 O 0.4912(10) 0.6461(7) 1.0690(4) 0.0549(17) Uani 1 1 d . . . 
O50 O 0.028(2) 0.4772(18) 0.6059(13) 0.025(4) Uani 0.25 1 d P B -1 
H50D H -0.0805 0.4856 0.6369 0.030 Uiso 0.25 1 d P C -1 
C50 C 0.022(4) 0.528(3) 0.506(2) 0.033(6) Uani 0.25 1 d PU B -1 
H50A H -0.1089 0.5824 0.4919 0.039 Uiso 0.25 1 calc PR B -1 
H50B H 0.0756 0.4424 0.4638 0.039 Uiso 0.25 1 calc PR B -1 
H50C H 0.0970 0.5941 0.4929 0.039 Uiso 0.25 1 calc PR B -1 
 
loop_ 
 _atom_site_aniso_label 
 _atom_site_aniso_U_11 
 _atom_site_aniso_U_22 
 _atom_site_aniso_U_33 
 _atom_site_aniso_U_23 
 _atom_site_aniso_U_13 
 _atom_site_aniso_U_12 
Re1 0.01926(16) 0.02341(18) 0.02326(16) -0.00325(11) -0.00808(10) -0.00589(11) 
Cl1 0.0330(9) 0.0624(13) 0.0464(11) -0.0085(9) 0.0121(8) -0.0305(9) 
N3 0.021(2) 0.020(3) 0.020(2) -0.004(2) 0.0000(19) -0.006(2) 
N2 0.025(2) 0.020(3) 0.027(3) 0.000(2) -0.008(2) -0.011(2) 
N1 0.021(2) 0.019(2) 0.017(2) -0.0015(19) -0.0029(18) -0.011(2) 
C22 0.031(3) 0.041(4) 0.036(4) 0.001(3) -0.011(3) -0.013(3) 
O22 0.045(3) 0.056(4) 0.050(3) -0.017(3) -0.018(2) -0.028(3) 
C4 0.025(3) 0.023(3) 0.071(5) -0.006(3) -0.019(3) -0.004(3) 
C1 0.037(3) 0.026(3) 0.025(3) 0.002(2) -0.011(3) -0.019(3) 
C5 0.021(3) 0.019(3) 0.036(3) -0.004(3) -0.007(2) -0.008(2) 
C2 0.059(5) 0.020(3) 0.039(4) 0.003(3) -0.022(3) -0.018(3) 
C7 0.059(4) 0.020(3) 0.048(4) 0.010(3) -0.033(4) -0.024(3) 
C8 0.073(5) 0.014(3) 0.018(3) 0.001(2) -0.014(3) -0.014(3) 
C3 0.047(4) 0.022(4) 0.058(5) -0.002(3) -0.030(4) 0.004(3) 
N4 0.043(3) 0.027(3) 0.019(2) -0.003(2) 0.004(2) -0.008(2) 
C9 0.045(7) 0.034(6) 0.018(5) 0.000(5) -0.007(6) -0.014(6) 
C10 0.049(7) 0.032(6) 0.018(5) -0.004(4) 0.003(5) -0.025(5) 
C11 0.065(7) 0.034(6) 0.025(5) -0.004(5) -0.001(5) -0.025(5) 
C12 0.067(9) 0.030(7) 0.022(6) -0.003(5) -0.006(6) -0.001(6) 
C13 0.068(8) 0.037(7) 0.034(6) -0.010(6) -0.016(7) 0.019(7) 
C14 0.057(8) 0.046(7) 0.028(6) -0.006(5) -0.020(6) 0.003(7) 
C109 0.026(6) 0.011(5) 0.023(5) 0.003(4) -0.005(5) -0.010(5) 
C110 0.027(5) 0.026(5) 0.026(5) 0.001(5) -0.008(5) -0.015(5) 
C111 0.039(7) 0.028(6) 0.026(6) -0.003(5) -0.002(5) -0.014(5) 
C112 0.047(7) 0.031(6) 0.018(5) -0.008(5) 0.001(5) -0.010(5) 
C113 0.039(6) 0.023(5) 0.016(5) -0.003(4) -0.004(4) -0.007(5) 
C114 0.033(5) 0.018(5) 0.013(5) -0.004(4) 0.002(4) -0.008(5) 
C6 0.018(3) 0.018(3) 0.057(4) -0.008(3) 0.002(3) -0.006(2) 
C21 0.042(4) 0.048(5) 0.063(5) -0.018(4) -0.036(4) 0.004(4) 
O21 0.069(4) 0.057(4) 0.112(6) -0.034(4) -0.062(4) 0.031(4) 
C23 0.059(5) 0.032(4) 0.031(4) 0.002(3) -0.019(3) -0.017(4) 
O23 0.110(5) 0.055(4) 0.017(2) 0.005(2) -0.007(3) -0.051(4) 
O50 0.015(7) 0.021(9) 0.037(9) -0.006(7) -0.004(7) -0.001(6) 
C50 0.035(9) 0.028(10) 0.031(9) -0.011(8) 0.006(8) -0.006(7) 
 
_geom_special_details 
; 
 All esds (except the esd in the dihedral angle between two l.s. planes) 
 are estimated using the full covariance matrix.  The cell esds are taken 
 into account individually in the estimation of esds in distances, angles 
 and torsion angles; correlations between esds in cell parameters are only 
 used when they are defined by crystal symmetry.  An approximate (isotropic) 
 treatment of cell esds is used for estimating esds involving l.s. planes. 
; 
 
loop_ 
 _geom_bond_atom_site_label_1 
 _geom_bond_atom_site_label_2 
 _geom_bond_distance 
 _geom_bond_site_symmetry_2 
 _geom_bond_publ_flag 
Re1 C21 1.897(8) . ? 
Re1 C23 1.906(8) . ? 
Re1 C22 1.922(8) . ? 
Re1 N3 2.163(5) . ? 
Re1 N1 2.197(5) . ? 
Re1 Cl1 2.4739(18) . ? 
N3 N4 1.318(7) . ? 
N3 N2 1.339(7) . ? 
N2 C7 1.346(8) . ? 
N2 C6 1.466(8) . ? 
N1 C1 1.348(8) . ? 
N1 C5 1.365(7) . ? 
C22 O22 1.148(9) . ? 
C4 C5 1.387(9) . ? 
C4 C3 1.394(10) . ? 
C4 H4 0.9500 . ? 
C1 C2 1.377(10) . ? 
C1 H1 0.9500 . ? 
C5 C6 1.499(8) . ? 
C2 C3 1.386(10) . ? 
C2 H2 0.9500 . ? 
C7 C8 1.382(11) . ? 
C7 H7 0.9500 . ? 
C8 N4 1.345(9) . ? 
C8 C9 1.474(18) . ? 
C8 C109 1.537(18) . ? 
C3 H3 0.9500 . ? 
C9 C10 1.36(2) . ? 
C9 C14 1.37(2) . ? 
C10 C11 1.412(19) . ? 
C10 H10 0.9500 . ? 
C11 C12 1.42(3) . ? 
C11 H11 0.9500 . ? 
C12 C13 1.34(3) . ? 
C12 H12 0.9500 . ? 
C13 C14 1.41(3) . ? 
C13 H13 0.9500 . ? 
C14 H14 0.9500 . ? 
C109 C110 1.374(18) . ? 
C109 C114 1.41(2) . ? 
C110 C111 1.39(2) . ? 
C110 H110 0.9500 . ? 
C111 C112 1.43(2) . ? 
C111 H111 0.9500 . ? 
C112 C113 1.40(2) . ? 
C112 H112 0.9500 . ? 
C113 C114 1.361(17) . ? 
C113 H113 0.9500 . ? 
C114 H114 0.9500 . ? 
C6 H6A 0.9900 . ? 
C6 H6B 0.9900 . ? 
C21 O21 1.159(10) . ? 
C23 O23 1.154(9) . ? 
O50 C50 1.38(4) . ? 
O50 H50D 0.8580 . ? 
C50 H50A 0.9800 . ? 
C50 H50B 0.9800 . ? 
C50 H50C 0.9800 . ? 
 
loop_ 
 _geom_angle_atom_site_label_1 
 _geom_angle_atom_site_label_2 
 _geom_angle_atom_site_label_3 
 _geom_angle 
 _geom_angle_site_symmetry_1 
 _geom_angle_site_symmetry_3 
 _geom_angle_publ_flag 
C21 Re1 C23 89.1(4) . . ? 
C21 Re1 C22 89.6(3) . . ? 
C23 Re1 C22 88.9(3) . . ? 
C21 Re1 N3 92.7(3) . . ? 
C23 Re1 N3 95.4(3) . . ? 
C22 Re1 N3 175.2(2) . . ? 
C21 Re1 N1 172.7(3) . . ? 
C23 Re1 N1 97.1(3) . . ? 
C22 Re1 N1 94.4(3) . . ? 
N3 Re1 N1 82.89(18) . . ? 
C21 Re1 Cl1 90.7(3) . . ? 
C23 Re1 Cl1 179.3(2) . . ? 
C22 Re1 Cl1 90.4(2) . . ? 
N3 Re1 Cl1 85.36(14) . . ? 
N1 Re1 Cl1 83.15(13) . . ? 
N4 N3 N2 108.7(5) . . ? 
N4 N3 Re1 128.7(4) . . ? 
N2 N3 Re1 122.6(4) . . ? 
N3 N2 C7 110.0(5) . . ? 
N3 N2 C6 121.0(5) . . ? 
C7 N2 C6 128.9(6) . . ? 
C1 N1 C5 117.2(5) . . ? 
C1 N1 Re1 119.4(4) . . ? 
C5 N1 Re1 123.3(4) . . ? 
O22 C22 Re1 177.9(7) . . ? 
C5 C4 C3 119.3(6) . . ? 
C5 C4 H4 120.3 . . ? 
C3 C4 H4 120.3 . . ? 
N1 C1 C2 122.9(6) . . ? 
N1 C1 H1 118.5 . . ? 
C2 C1 H1 118.5 . . ? 
N1 C5 C4 122.5(6) . . ? 
N1 C5 C6 117.8(5) . . ? 
C4 C5 C6 119.7(5) . . ? 
C1 C2 C3 120.0(6) . . ? 
C1 C2 H2 120.0 . . ? 
C3 C2 H2 120.0 . . ? 
N2 C7 C8 104.4(6) . . ? 
N2 C7 H7 127.8 . . ? 
C8 C7 H7 127.8 . . ? 
N4 C8 C7 109.1(5) . . ? 
N4 C8 C9 135.6(10) . . ? 
C7 C8 C9 115.1(10) . . ? 
N4 C8 C109 112.3(8) . . ? 
C7 C8 C109 138.4(8) . . ? 
C9 C8 C109 24.2(6) . . ? 
C2 C3 C4 117.9(6) . . ? 
C2 C3 H3 121.0 . . ? 
C4 C3 H3 121.0 . . ? 
N3 N4 C8 107.7(6) . . ? 
C10 C9 C14 120.3(16) . . ? 
C10 C9 C8 128.0(15) . . ? 
C14 C9 C8 111.5(16) . . ? 
C9 C10 C11 121.6(17) . . ? 
C9 C10 H10 119.2 . . ? 
C11 C10 H10 119.2 . . ? 
C10 C11 C12 116.5(17) . . ? 
C10 C11 H11 121.7 . . ? 
C12 C11 H11 121.7 . . ? 
C13 C12 C11 122.1(18) . . ? 
C13 C12 H12 119.0 . . ? 
C11 C12 H12 119.0 . . ? 
C12 C13 C14 119(2) . . ? 
C12 C13 H13 120.4 . . ? 
C14 C13 H13 120.4 . . ? 
C9 C14 C13 120.2(19) . . ? 
C9 C14 H14 119.9 . . ? 
C13 C14 H14 119.9 . . ? 
C110 C109 C114 117.7(14) . . ? 
C110 C109 C8 114.9(13) . . ? 
C114 C109 C8 127.3(12) . . ? 
C109 C110 C111 123.0(15) . . ? 
C109 C110 H110 118.5 . . ? 
C111 C110 H110 118.5 . . ? 
C110 C111 C112 117.5(15) . . ? 
C110 C111 H111 121.3 . . ? 
C112 C111 H111 121.3 . . ? 
C113 C112 C111 120.2(14) . . ? 
C113 C112 H112 119.9 . . ? 
C111 C112 H112 119.9 . . ? 
C114 C113 C112 119.4(14) . . ? 
C114 C113 H113 120.3 . . ? 
C112 C113 H113 120.3 . . ? 
C113 C114 C109 122.2(13) . . ? 
C113 C114 H114 118.9 . . ? 
C109 C114 H114 118.9 . . ? 
N2 C6 C5 112.4(5) . . ? 
N2 C6 H6A 109.1 . . ? 
C5 C6 H6A 109.1 . . ? 
N2 C6 H6B 109.1 . . ? 
C5 C6 H6B 109.1 . . ? 
H6A C6 H6B 107.8 . . ? 
O21 C21 Re1 177.5(8) . . ? 
O23 C23 Re1 176.0(7) . . ? 
C50 O50 H50D 115.0 . . ? 
 
_diffrn_measured_fraction_theta_max    0.989 
_diffrn_reflns_theta_full              26.44 
_diffrn_measured_fraction_theta_full   0.989 
_refine_diff_density_max    2.015 
_refine_diff_density_min   -1.629 
_refine_diff_density_rms    0.250 
